# Supplementary material
Source: PubMed Central journal article supplement (PMC4826277)
Supplement: NIHMS63230-supplement-8si20051128_07.pdf [file NIHMS63230-supplement-8si20051128_07.pdf]

**Supporting Information**

**For**

**Synthetic Analogues of the Active Site of the A-cluster of Acetyl Coenzyme A Synthase/CO Dehydrogenase: Syntheses, Structures, and Reactions with CO**

**Todd C. Harrop,<sup>a</sup> Marilyn M. Olmstead,<sup>b</sup> and Pradip K. Mascharak<sup>\*a</sup>**

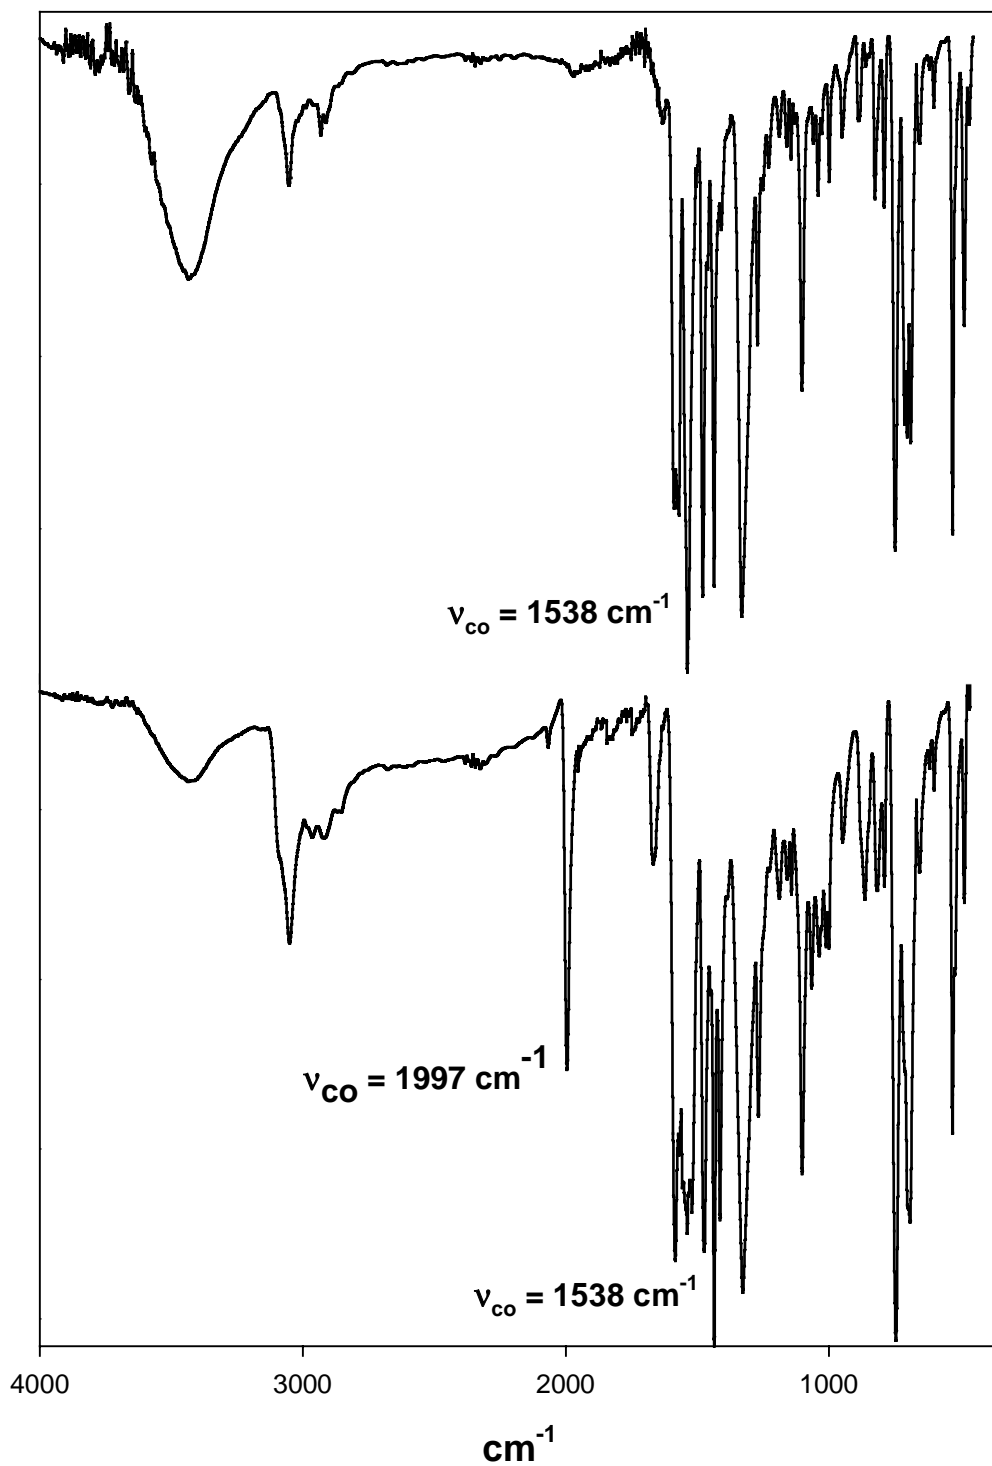

Figure S1. FTIR spectrum of  $[\text{Ni}(\text{dppe})\text{Ni}(\text{PhPepS})]$  (**10**, top panel) and  $[\text{Ni}^{\text{I}}(\text{dppe})(\text{CO})\text{Ni}(\text{PhPepS})]^-$  (**10<sub>red-CO</sub>**, bottom panel) in KBr matrix.

**Table 1.** Summary of Crystal Data and Intensity Collection and Structure Refinement Parameters for (Et<sub>4</sub>N)<sub>2</sub>[Ni(PhPepS)] (**2**), (Et<sub>4</sub>N)[Cu(neo)Ni(NpPepS)]•0.5Et<sub>2</sub>O•0.5H<sub>2</sub>O (**3**•0.5Et<sub>2</sub>O•0.5H<sub>2</sub>O), (Et<sub>4</sub>N)[Cu(neo)Ni(PhPepS)]•H<sub>2</sub>O (**4**•H<sub>2</sub>O), (Et<sub>4</sub>N)<sub>2</sub>[Ni(NpPepS)]<sub>2</sub>•DMF (**5**•DMF), (Et<sub>4</sub>N)<sub>2</sub>[Ni(NpPepS)]<sub>2</sub>•3DMF (**6**•3DMF), (Et<sub>4</sub>N)<sub>2</sub>[Ni(DMF)<sub>2</sub>{Ni(PhPepS)}<sub>2</sub>] (**8**), [Ni(dppe)Ni(PhPepS)]•CH<sub>2</sub>Cl<sub>2</sub> (**10**•CH<sub>2</sub>Cl<sub>2</sub>)

| Parameters                           | <b>2</b>                                                                        | <b>3</b> •0.5Et <sub>2</sub> O•0.5H <sub>2</sub> O                                  | <b>4</b> •H <sub>2</sub> O                                                        | <b>5</b> •DMF                                                                                | <b>6</b> •3DMF                                                                                 | <b>8</b>                                                                                     | <b>10</b> •CH <sub>2</sub> Cl <sub>2</sub>                                                                                  |
|--------------------------------------|---------------------------------------------------------------------------------|-------------------------------------------------------------------------------------|-----------------------------------------------------------------------------------|----------------------------------------------------------------------------------------------|------------------------------------------------------------------------------------------------|----------------------------------------------------------------------------------------------|-----------------------------------------------------------------------------------------------------------------------------|
| formula                              | C <sub>36</sub> H <sub>52</sub> N <sub>4</sub> O <sub>2</sub> S <sub>2</sub> Ni | C <sub>49</sub> H <sub>49.5</sub> N <sub>5</sub> O <sub>3</sub> S <sub>2</sub> CuNi | C <sub>42</sub> H <sub>46</sub> N <sub>5</sub> O <sub>3</sub> S <sub>2</sub> CuNi | C <sub>67</sub> H <sub>74</sub> N <sub>7</sub> O <sub>5</sub> S <sub>4</sub> Ni <sub>3</sub> | C <sub>79</sub> H <sub>103</sub> N <sub>11</sub> O <sub>9</sub> S <sub>4</sub> Ni <sub>3</sub> | C <sub>62</sub> H <sub>78</sub> N <sub>8</sub> O <sub>6</sub> S <sub>4</sub> Ni <sub>3</sub> | C <sub>47</sub> H <sub>38</sub> N <sub>2</sub> O <sub>2</sub> F <sub>2</sub> S <sub>2</sub> Cl <sub>2</sub> Ni <sub>2</sub> |
| mol wt                               | 695.65                                                                          | 930.80                                                                              | 855.21                                                                            | 1361.70                                                                                      | 1655.09                                                                                        | 1335.69                                                                                      | 977.17                                                                                                                      |
| cryst color,                         | red needle                                                                      | red plate                                                                           | red needle                                                                        | black block                                                                                  | red                                                                                            | red block                                                                                    | black prism                                                                                                                 |
| habit                                |                                                                                 |                                                                                     |                                                                                   | parallelepiped                                                                               |                                                                                                |                                                                                              |                                                                                                                             |
| T, K                                 | 90(2)                                                                           | 93(2)                                                                               | 90(2)                                                                             | 90(2)                                                                                        | 130(2)                                                                                         | 90(2)                                                                                        | 90(2)                                                                                                                       |
| cryst syst                           | monoclinic                                                                      | triclinic                                                                           | orthorhombic                                                                      | monoclinic                                                                                   | monoclinic                                                                                     | monoclinic                                                                                   | monoclinic                                                                                                                  |
| space group                          | P2 <sub>1</sub> /n                                                              | P1                                                                                  | Pna2 <sub>1</sub>                                                                 | P2 <sub>1</sub> /c                                                                           | P2 <sub>1</sub> /c                                                                             | P2 <sub>1</sub> /c                                                                           | P2 <sub>1</sub> /n                                                                                                          |
| a, Å                                 | 12.6126(9)                                                                      | 12.4276(18)                                                                         | 19.9276(7)                                                                        | 18.6353(15)                                                                                  | 17.009(3)                                                                                      | 12.2141(15)                                                                                  | 14.0656(5)                                                                                                                  |
| b, Å                                 | 19.7239(14)                                                                     | 17.482(2)                                                                           | 20.5446(7)                                                                        | 20.2119(17)                                                                                  | 13.0882(16)                                                                                    | 15.5332(17)                                                                                  | 17.3249(6)                                                                                                                  |
| c, Å                                 | 14.6251(10)                                                                     | 22.792(3)                                                                           | 9.3913(3)                                                                         | 17.3241(14)                                                                                  | 37.076(4)                                                                                      | 16.2978(19)                                                                                  | 17.5370(6)                                                                                                                  |
| α, deg                               | 90                                                                              | 108.535(4)                                                                          | 90                                                                                | 90                                                                                           | 90                                                                                             | 90                                                                                           | 90                                                                                                                          |
| β, deg                               | 106.900(10)                                                                     | 93.198(6)                                                                           | 90                                                                                | 110.887(3)                                                                                   | 101.902(12)                                                                                    | 97.638(3)                                                                                    | 90.610(3)                                                                                                                   |
| γ, deg                               | 90                                                                              | 110.092(6)                                                                          | 90                                                                                | 90                                                                                           | 90                                                                                             | 90                                                                                           | 90                                                                                                                          |
| V, Å <sup>3</sup>                    | 3421.0(4)                                                                       | 4332.9(10)                                                                          | 3844.8(2)                                                                         | 2816.1(13)                                                                                   | 8076.0(2)                                                                                      | 3064.7(6)                                                                                    | 4273.3(3)                                                                                                                   |
| Z                                    | 4                                                                               | 4                                                                                   | 4                                                                                 | 4                                                                                            | 4                                                                                              | 2                                                                                            | 4                                                                                                                           |
| d <sub>calc</sub> , <sup>b</sup>     | 1.351                                                                           | 1.429                                                                               | 1.477                                                                             | 1.484                                                                                        | 1.361                                                                                          | 1.447                                                                                        | 1.519                                                                                                                       |
| g•cm <sup>-3</sup>                   |                                                                                 |                                                                                     |                                                                                   |                                                                                              |                                                                                                |                                                                                              |                                                                                                                             |
| Abs coeff,                           | 0.728                                                                           | 1.070                                                                               | 1.199                                                                             | 1.112                                                                                        | 2.277                                                                                          | 1.106                                                                                        | 1.221                                                                                                                       |
| μ, mm <sup>-1</sup>                  |                                                                                 |                                                                                     |                                                                                   |                                                                                              |                                                                                                |                                                                                              |                                                                                                                             |
| GOF <sup>[a]</sup> on F <sup>2</sup> | 1.010                                                                           | 1.008                                                                               | 1.086                                                                             | 1.052                                                                                        | 1.004                                                                                          | 1.089                                                                                        | 1.001                                                                                                                       |
| R1, <sup>[b]</sup> %                 | 4.49                                                                            | 5.64                                                                                | 2.80                                                                              | 4.99                                                                                         | 4.60                                                                                           | 6.44                                                                                         | 3.12                                                                                                                        |
| wR2, <sup>[c]</sup> %                | 10.29                                                                           | 12.19                                                                               | 6.75                                                                              | 12.15                                                                                        | 10.13                                                                                          | 13.03                                                                                        | 7.23                                                                                                                        |

<sup>a</sup> GOF =  $[\sum[w(F_o^2 - F_c^2)^2]/(M - N)]^{1/2}$  (M = number of reflections, N = number of parameters refined). <sup>b</sup> R1 =  $\sum |F_o| - |F_d| / \sum |F_o|$ ; <sup>c</sup> wR2 =  $[\sum[w(F_o^2 - F_c^2)^2] / \sum[w(F_o^2)]]^{1/2}$ .



**Table 2 (continued).** Selected Bond Distances [Å] and Bond Angles [deg] for the Complexes.

| Complex 5 |            | Complex 6 |           |           |            |           |           |
|-----------|------------|-----------|-----------|-----------|------------|-----------|-----------|
| Ni1-Ni2   | 3.2410(7)  | S1-Ni2-S2 | 84.52(4)  | Ni1-Ni2   | 3.374(4)   | O5-Ni2-O6 | 85.60(12) |
| Ni2-Ni3   | 3.2128(7)  | S3-Ni2-S4 | 84.67(4)  | Ni2-Ni3   | 3.375(4)   | O5-Ni2-S2 | 99.55(9)  |
| Ni1-N1    | 1.884(3)   | S1-Ni2-S4 | 177.97(4) | Ni1-N1    | 1.898(3)   | O6-Ni2-S2 | 91.27(8)  |
| Ni1-N2    | 1.882(3)   | S2-Ni2-S4 | 96.07(4)  | Ni1-N2    | 1.887(3)   | O5-Ni2-S4 | 91.82(9)  |
| Ni1-S1    | 2.1820(11) | O1-C7-N1  | 126.4(4)  | Ni1-S1    | 2.1828(12) | O6-Ni2-S4 | 97.69(9)  |
| Ni1-S2    | 2.1895(10) | O1-C7-C6  | 117.8(4)  | Ni1-S2    | 2.1697(13) | S2-Ni2-S4 | 166.05(5) |
| Ni2-S1    | 2.2331(10) | N1-C7-C6  | 115.6(3)  | Ni2-O5    | 2.053(3)   | O5-Ni2-S3 | 171.31(9) |
| Ni2-S3    | 2.2323(11) | C1-S1-Ni1 | 87.72(13) | Ni2-O6    | 2.070(3)   | O6-Ni2-S3 | 96.15(9)  |
| Ni2-S2    | 2.2354(11) |           |           | Ni2-S1    | 2.4877(13) | S2-Ni2-S3 | 88.94(4)  |
| Ni2-S4    | 2.2464(10) |           |           | Ni2-S3    | 2.4495(12) | S4-Ni2-S3 | 79.52(4)  |
| C7-O1     | 1.248(5)   |           |           | Ni2-S2    | 2.4112(13) | O5-Ni2-S1 | 98.72(9)  |
| C7-N1     | 1.348(5)   |           |           | Ni2-S4    | 2.4302(13) | O6-Ni2-S1 | 170.41(9) |
| N2-Ni1-N1 | 89.16(14)  |           |           | C7-O1     | 1.254(5)   | S2-Ni2-S1 | 79.61(4)  |
| N2-Ni1-S1 | 170.96(10) |           |           | C7-N1     | 1.354(5)   | S4-Ni2-S1 | 90.76(4)  |
| N1-Ni1-S1 | 91.70(11)  |           |           | N2-Ni1-N1 | 87.99(15)  | S3-Ni2-S1 | 80.87(4)  |
| N2-Ni1-S2 | 91.51(10)  |           |           | N2-Ni1-S2 | 89.39(11)  | O1-C7-N1  | 124.8(4)  |
| N1-Ni1-S2 | 174.89(11) |           |           | N1-Ni1-S2 | 175.73(11) | O1-C7-C6  | 117.6(4)  |
| S2-Ni1-S1 | 86.85(4)   |           |           | N2-Ni1-S1 | 177.93(11) | N1-C7-C6  | 117.6(4)  |
| S3-Ni2-S1 | 94.58(4)   |           |           | N1-Ni1-S1 | 90.33(11)  | C1-S1-Ni1 | 97.67(14) |
| S3-Ni2-S2 | 175.61(4)  |           |           | S2-Ni1-S1 | 92.22(5)   |           |           |

**Table 2 (continued).** Selected Bond Distances [Å] and Bond Angles [deg] for the Complexes.

| Complex 8  |            | Complex 10  |            |            |            |            |             |
|------------|------------|-------------|------------|------------|------------|------------|-------------|
| Ni1-Ni2    | 3.4030(8)  | O3A-Ni2-S1A | 93.65(18)  | Ni1-Ni2    | 2.8255(4)  | S1-Ni1-Ni2 | 51.198(15)  |
| Ni1-N1     | 1.898(5)   | O3-Ni2-S1A  | 86.35(18)  | Ni1-N1     | 1.8909(17) | P1-Ni2-P2  | 86.18(2)    |
| Ni1-N2     | 1.895(5)   | O3A-Ni2-S1  | 93.65(18)  | Ni1-N2     | 1.8895(17) | P1-Ni2-S1  | 99.13(2)    |
| Ni1-S1     | 2.1880(18) | O3-Ni2-S1   | 180.00(18) | Ni1-S1     | 2.1558(5)  | P2-Ni2-S1  | 173.53(2)   |
| Ni1-S2     | 2.1565(18) | S1A-Ni2-S1  | 84.15(18)  | Ni1-S2     | 2.1438(5)  | P1-Ni2-S2  | 172.59(2)   |
| Ni2-O3     | 2.063(5)   | O3A-Ni2-S2  | 95.85(18)  | Ni2-P1     | 2.1781(6)  | P2-Ni2-S2  | 99.44(2)    |
| Ni2-O3A    | 2.063(5)   | O3-Ni2-S2   | 103.50(5)  | Ni2-P2     | 2.1816(6)  | S1-Ni2-S2  | 75.585(19)  |
| Ni2-S1     | 2.4412(16) | S1A-Ni2-S2  | 76.50(5)   | Ni2-S1     | 2.2354(6)  | P1-Ni2-Ni1 | 131.452(18) |
| Ni2-S1A    | 2.4412(16) | S1-Ni2-S2   | 95.85(18)  | Ni2-S2     | 2.2413(5)  | P2-Ni2-Ni1 | 124.842(18) |
| Ni2-S2     | 2.4537(18) | O3A-Ni2-S2A | 84.15(18)  | C7-O1      | 1.244(3)   | S1-Ni2-Ni1 | 48.725(14)  |
| Ni2-S2A    | 2.4538(18) | O3-Ni2-S2A  | 76.50(5)   | C7-N1      | 1.359(3)   | S2-Ni2-Ni1 | 48.387(14)  |
| C7-O1      | 1.251(8)   | S1A-Ni2-S2A | 103.50(5)  | N2-Ni1-N1  | 86.79(8)   | O1-C7-N1   | 123.6(2)    |
| C7-N1      | 1.336(9)   | S1-Ni2-S2A  | 180.00(18) | N2-Ni1-S2  | 97.29(5)   | O1-C7-C6   | 117.44(19)  |
| N2-Ni1-N1  | 85.10(2)   | S2-Ni2-S2A  | 100.2(2)   | N1-Ni1-S2  | 175.92(6)  | N1-C7-C6   | 118.61(18)  |
| N2-Ni1-S2  | 93.56(16)  | O1-C7-N1    | 125.3(6)   | N2-Ni1-S1  | 176.58(6)  | C1-S1-Ni1  | 111.15(7)   |
| N1-Ni1-S2  | 174.77(16) | O1-C7-C6    | 117.1(6)   | N1-Ni1-S1  | 96.64(6)   |            |             |
| N2-Ni1-S1  | 177.42(15) | N1-C7-C6    | 117.5(6)   | S2-Ni1-S1  | 79.29(2)   |            |             |
| N1-Ni1-S1  | 92.79(17)  | C1-S1-Ni1   | 100.2(2)   | N2-Ni1-Ni2 | 126.55(6)  |            |             |
| S2-Ni1-S1  | 88.46(7)   |             |            | N1-Ni1-Ni2 | 125.67(5)  |            |             |
| O3A-Ni2-O3 | 180.00(18) |             |            | S2-Ni1-Ni2 | 51.412(15) |            |             |
